# Supplementary material for: Precise CAG repeat contraction in a Huntington’s Disease mouse model is enabled by gene editing with SpCas9-NG
Source: PubMed Central journal article supplement (PMC8222283; doi:10.1038/s42003-021-02304-w), 2021-06-23
Supplement: 42003_2021_2304_MOESM2_ESM.pdf [file 42003_2021_2304_MOESM2_ESM.pdf]

## Supplementary information for

### Precise CAG repeat contraction in a Huntington's Disease mouse model is enabled by gene editing with SpCas9-NG

Seiya Oura<sup>1,2,11</sup>, Taichi Noda<sup>1,3,11</sup>, Naoko Morimura<sup>4</sup>, Seiji Hitoshi<sup>4</sup>, Hiroshi Nishimasu<sup>5,6</sup>, Yoshitaka Nagai<sup>7,8,9</sup>, Osamu Nureki<sup>5</sup>, Masahito Ikawa<sup>1,2,10,\*</sup>

<sup>1</sup>Department of Experimental Genome Research, Research Institute for Microbial Diseases, Osaka University, 3-1 Yamada-oka, Suita, Osaka 565-0871, Japan.

<sup>2</sup>Graduate School of Pharmaceutical Sciences, Osaka University, 1-6 Yamada-oka, Suita, Osaka 565-0871, Japan.

<sup>3</sup>Division of Reproductive Biology, Institute of Resource Development and Analysis, Kumamoto University, 2-2-1 Honjo, Chuo-ku, Kumamoto 860-0811, Japan

<sup>4</sup>Department of Integrative Physiology, Shiga University of Medical Science, Otsu, Shiga, Japan.

<sup>5</sup>Department of Biological Sciences, Graduate School of Science, The University of Tokyo, 7-3-1 Hongo, Bunkyo-ku, Tokyo 113-0033, Japan.

<sup>6</sup>Department of Structural Biology, Research center for Advanced Science and Technology, The University of Tokyo, 4-6-1 Komaba, Meguro-ku, Tokyo 153-8904, Japan.

<sup>7</sup>Department of Degenerative Neurological Diseases, National Institute of Neuroscience, National Center of Neurology and Psychiatry, Kodaira 187-8502, Japan.

<sup>8</sup>Department of Neurotherapeutics, Osaka University Graduate School of Medicine, Osaka 565-0871, Japan.

<sup>9</sup>Department of Neurology, Kindai University Faculty of Medicine, 377-2 Ohnohigashi, Osaka-Sayama, Osaka 589-8511, Japan

<sup>10</sup>Laboratory of Reproductive Systems Biology, Institute of Medical Science, The University of Tokyo, 4-6-1 Shirokanedai, Minato-ku, Tokyo, 108-8639, Japan.

<sup>11</sup>These authors contributed equally: Seiya Oura, Taichi Noda

\*To whom correspondence should be addressed. E-mail: [ikawa@biken.osaka-u.ac.jp](mailto:ikawa@biken.osaka-u.ac.jp)

This PDF file includes:

Supplementary Figure 1 to 10

Other Supplementary materials for this manuscript include the following:

Supplementary Data 1 to 6

Supplementary Movie 1 and 2

# Supplementary Figure 1

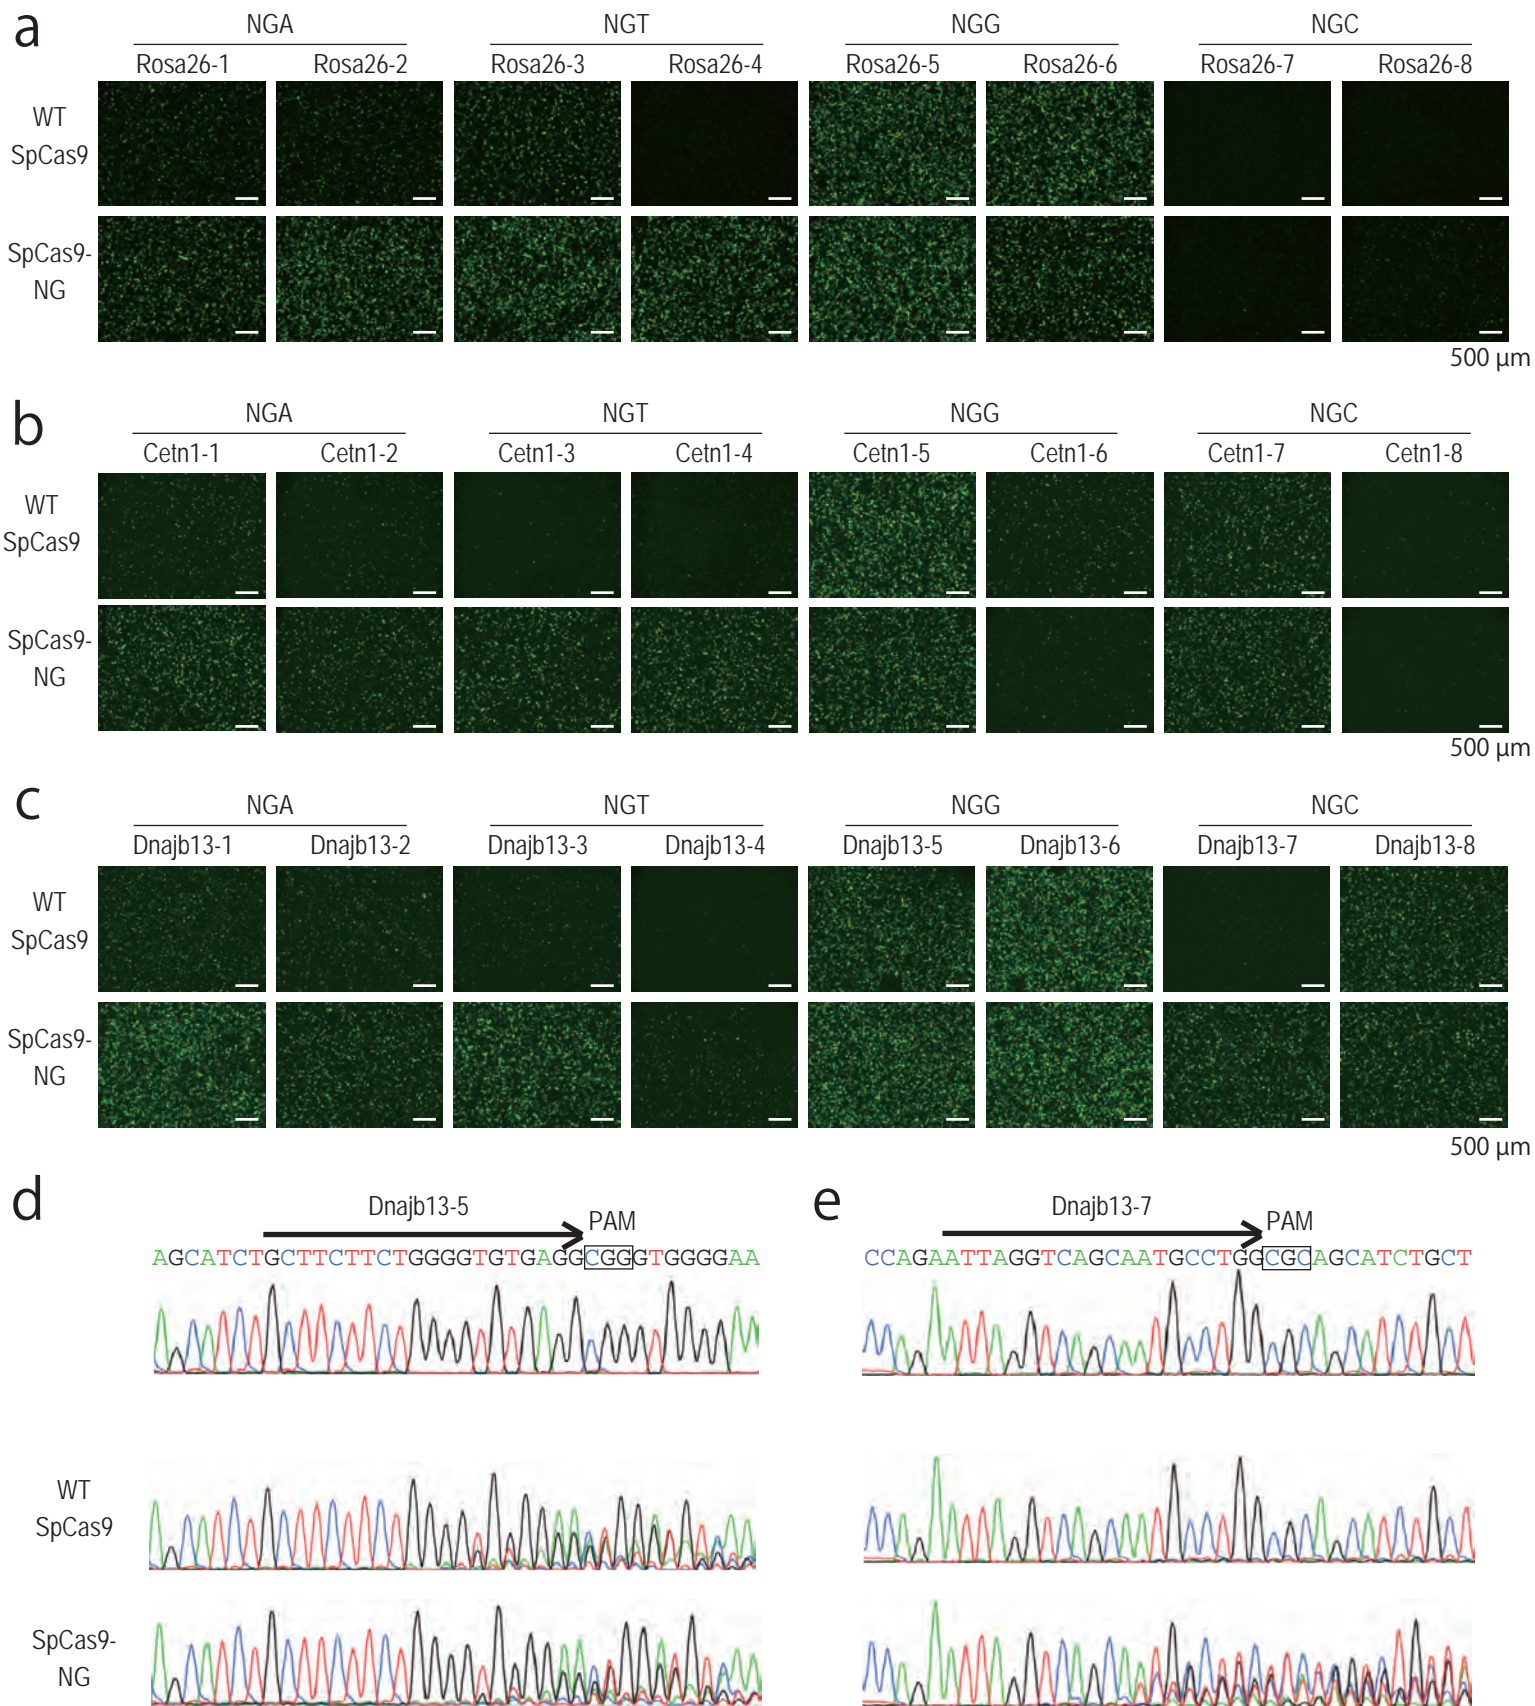

## Supplementary Figure 1. Genome editing with SpCas9-NG, related to Fig. 1

**a–c** The EGFP fluorescence images were taken 36 hours after transfection in the SSA assay.

**d, e** Sequence of pooled ES cell genome samples. Black arrows and boxes show gRNA target sequence and PAM, respectively.

# Supplementary Figure 2

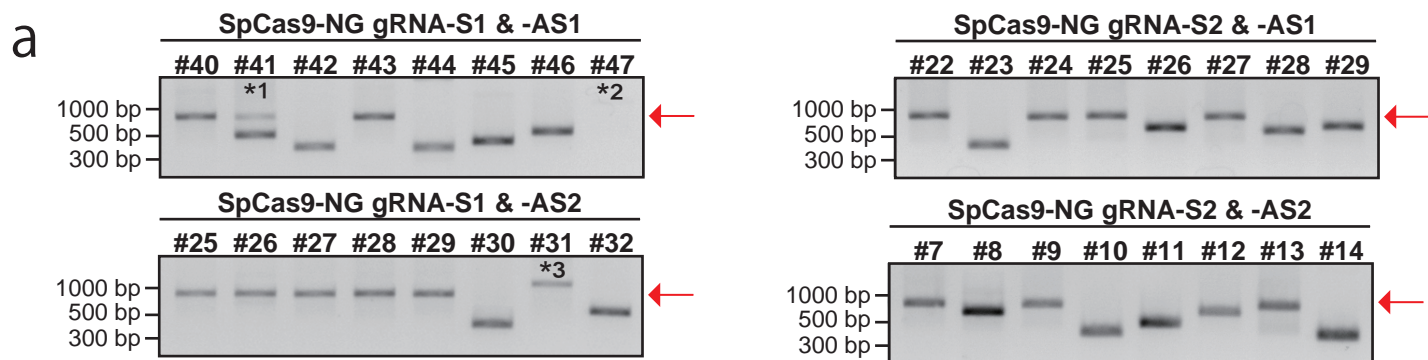

\*1 Mosaic \*2 No PCR amplicon \*3 Upward-shift

| gRNA          | Examined clones | contracted | in-frame |
|---------------|-----------------|------------|----------|
| gRNA S1 & AS1 | 40              | 10         | 2        |
| gRNA S1 & AS2 | 48              | 8          | 3        |
| gRNA S2 & AS1 | 39              | 13         | 4        |
| gRNA S2 & AS2 | 44              | 10         | 1        |

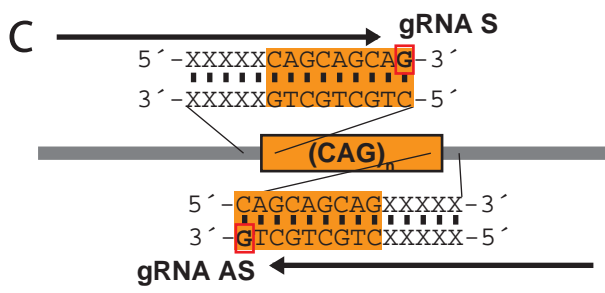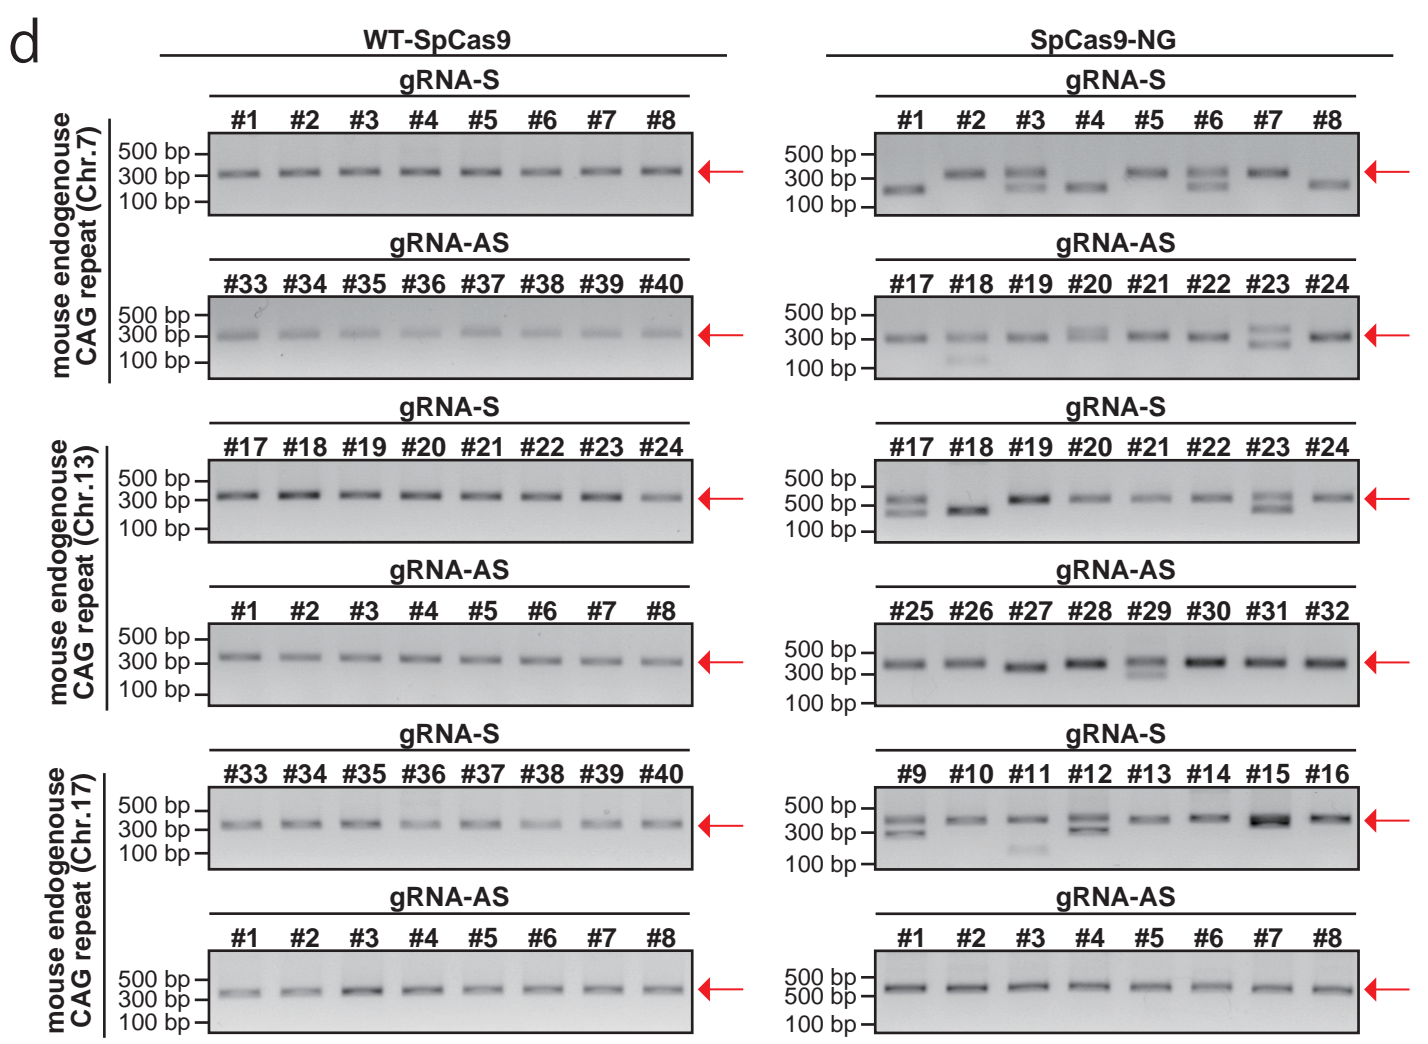

| Target             | gRNA    | WT-SpCas9 |            | SpCas9-NG |            |
|--------------------|---------|-----------|------------|-----------|------------|
|                    |         | Clones    | Contracted | Clones    | Contracted |
| CAG repeat (Chr.7) | gRNA S  | 48        | 0          | 43        | 23         |
|                    | gRNA AS | 48        | 0          | 45        | 2          |
| CAG repeat (Chr.7) | gRNA S  | 47        | 0          | 48        | 12         |
|                    | gRNA AS | 48        | 0          | 43        | 4          |
| CAG repeat (Chr.7) | gRNA S  | 48        | 1          | 47        | 18         |
|                    | gRNA AS | 48        | 0          | 46        | 3          |

**Supplementary Figure 2. Two-hit method for CAG repeat contraction and targeting of mouse endogenous CAG repeats, related to Fig. 2**

**a** PCR-based screen for successfully contracted clones. The red arrows indicate the original size of the PCR amplicon. **b** Summary of PCR-based screening in 2A and direct sequencing. **c** Design of gRNAs for targeting mouse endogenous CAG repeats. The orange background color shows the area of the repeat tract. Bold characters with a red box in the DNA sequence indicate the second G in NGN-PAMs. **d** PCR-based confirmation of CAG repeat contraction. The red arrow indicates the original size of the PCR amplicon. **e** Summary of PCR-based confirmation of repeat contraction in 2C.

# Supplementary Figure 3

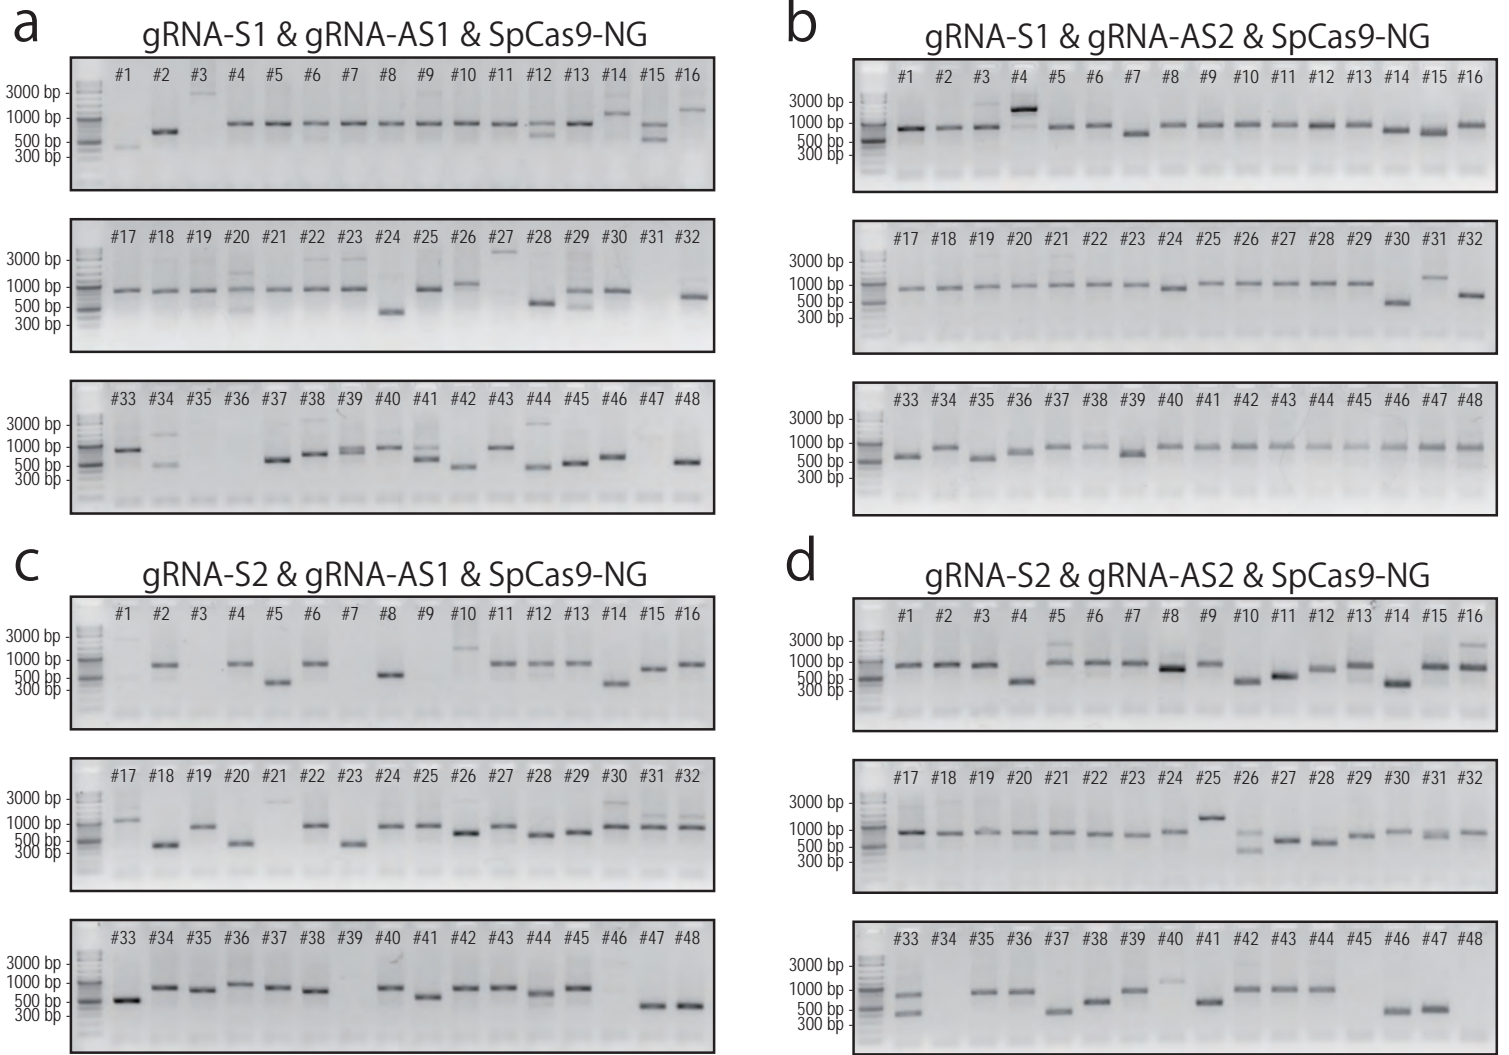

**Supplementary Figure 3. Whole gel images of PCR based screening of ES cell clones, related to Supplementary Figure 2a.**

# Supplementary Figure 4

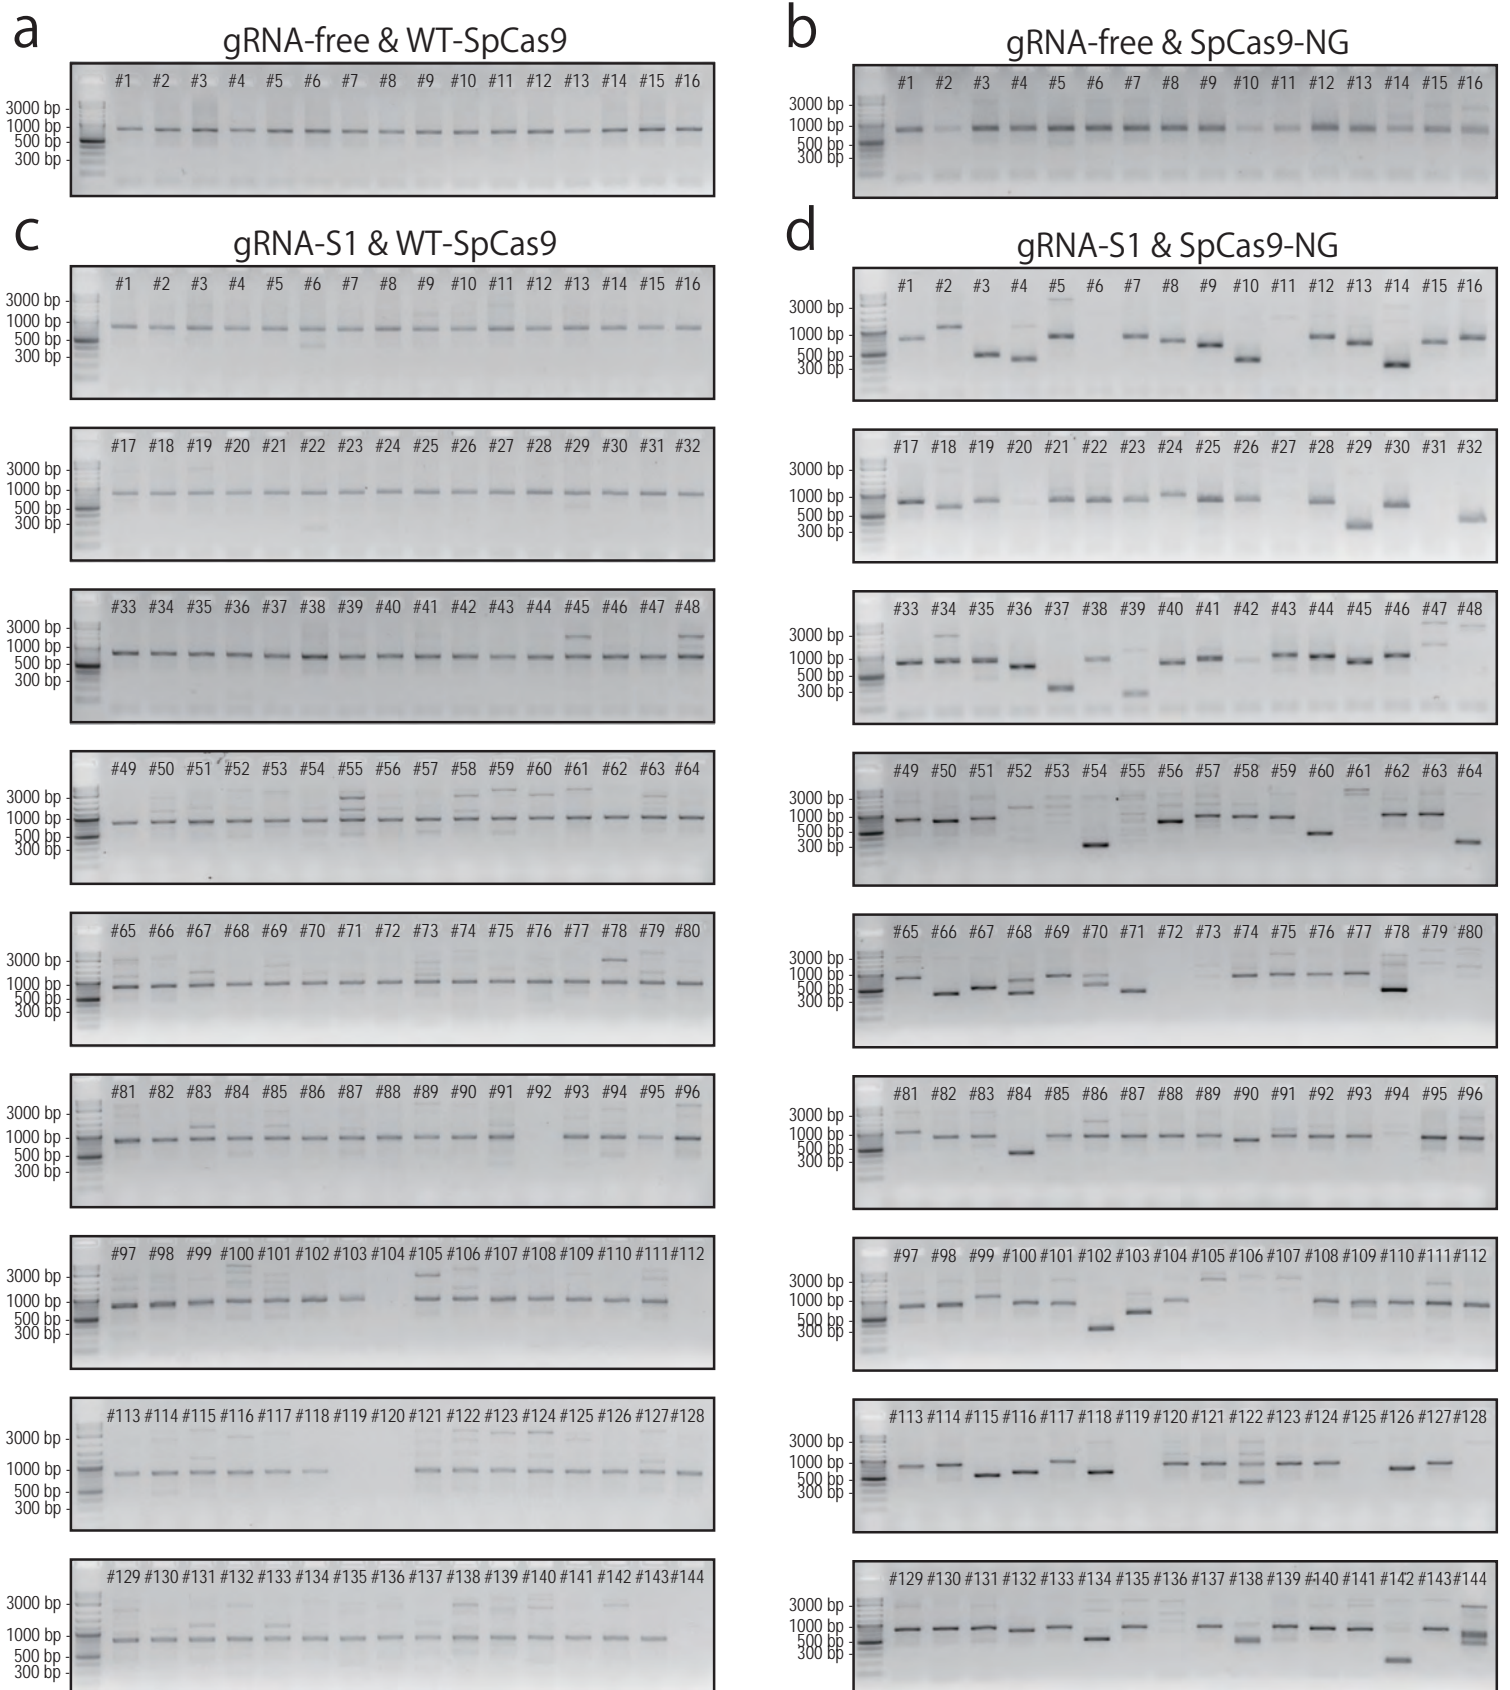

**Supplementary Figure 4. Whole gel images of PCR based screening of ES cell clones, related to Figure 2c.**

# Supplementary Figure 5

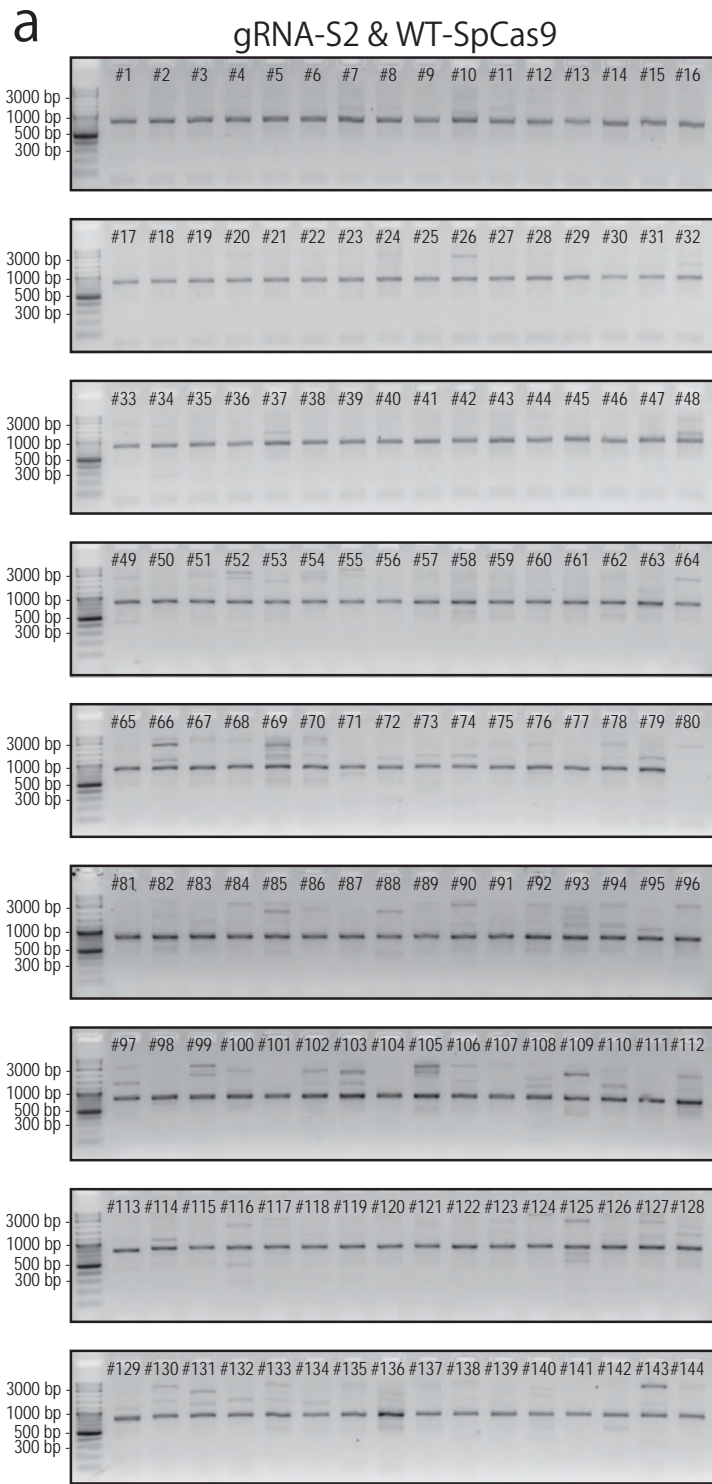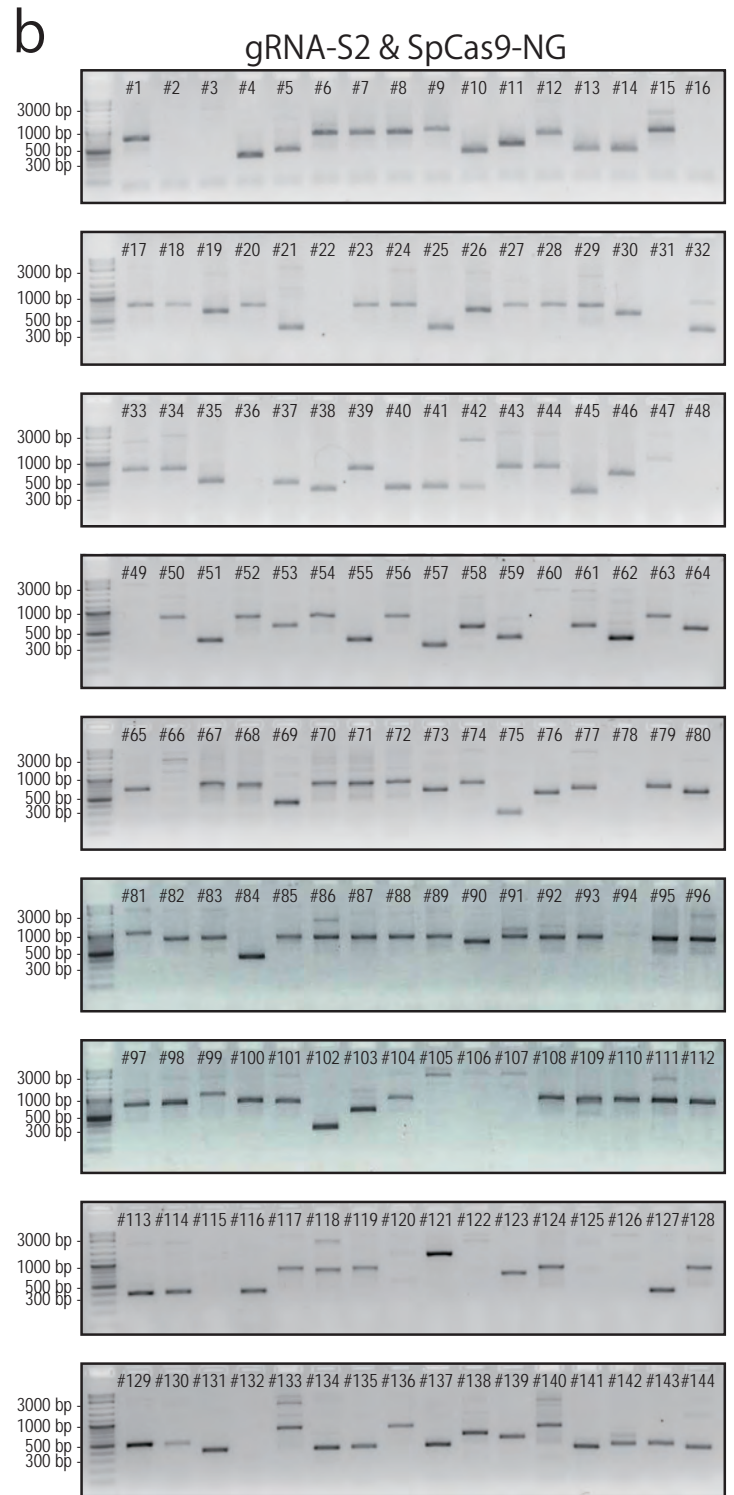

**Supplementary Figure 5. Whole gel images of PCR based screening of ES cell clones, related to Figure 2c.**

# Supplementary Figure 6

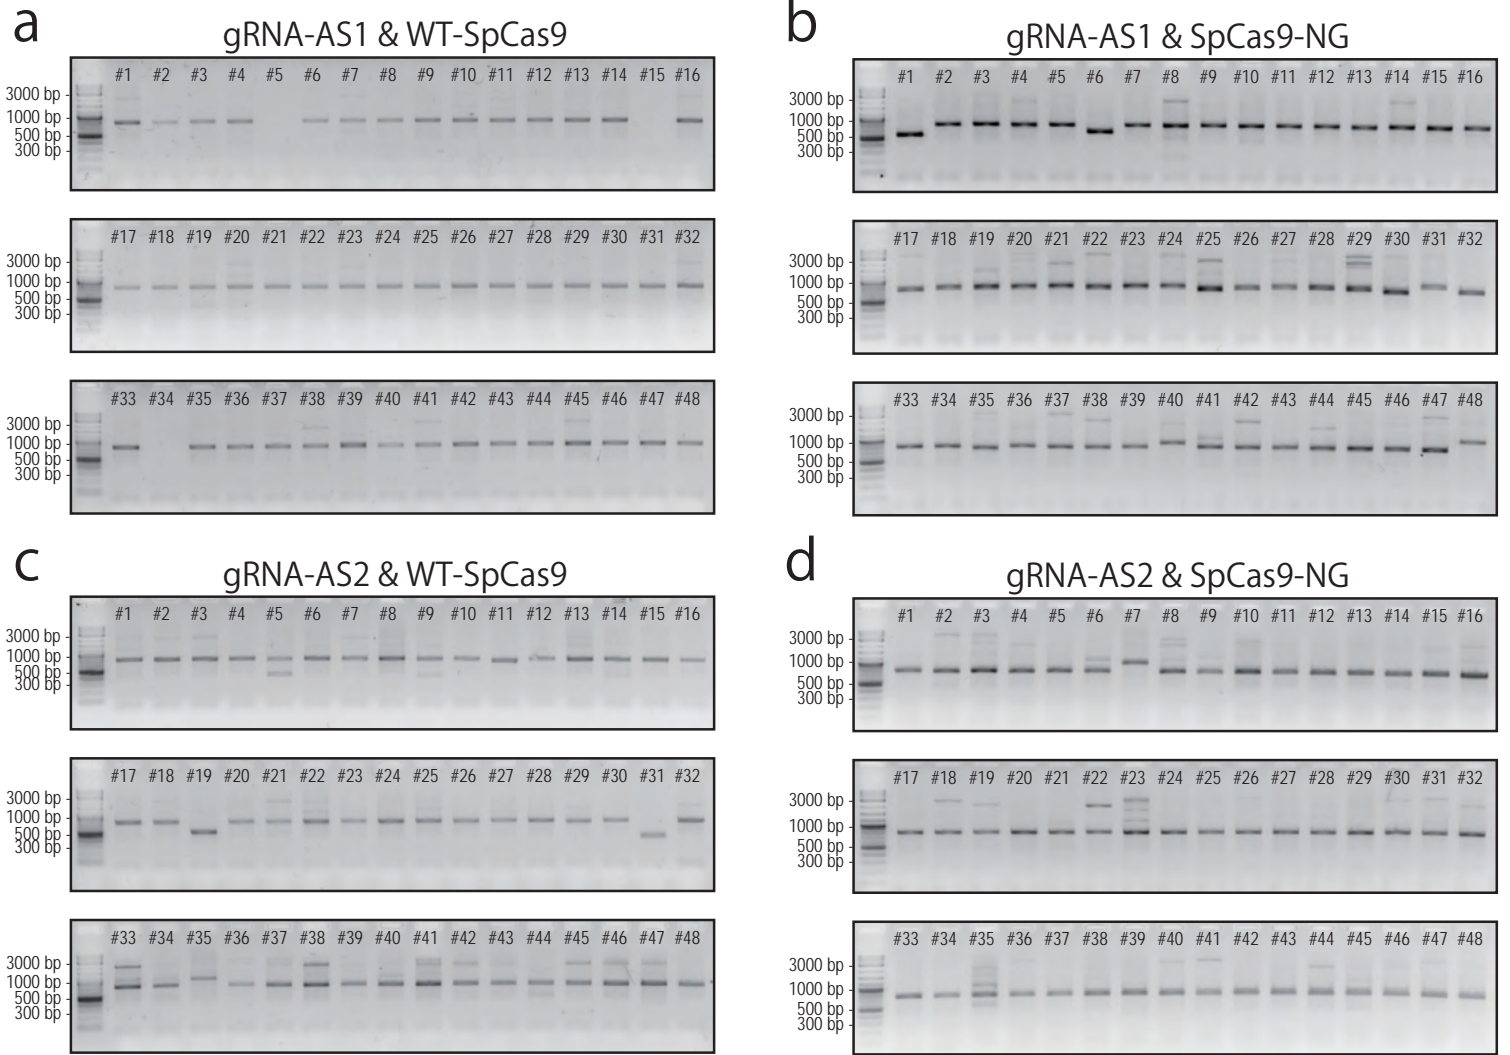

**Supplementary Figure 6. Whole gel images of PCR based screening of ES cell clones, related to Figure 2c.**



# Supplementary Figure 7

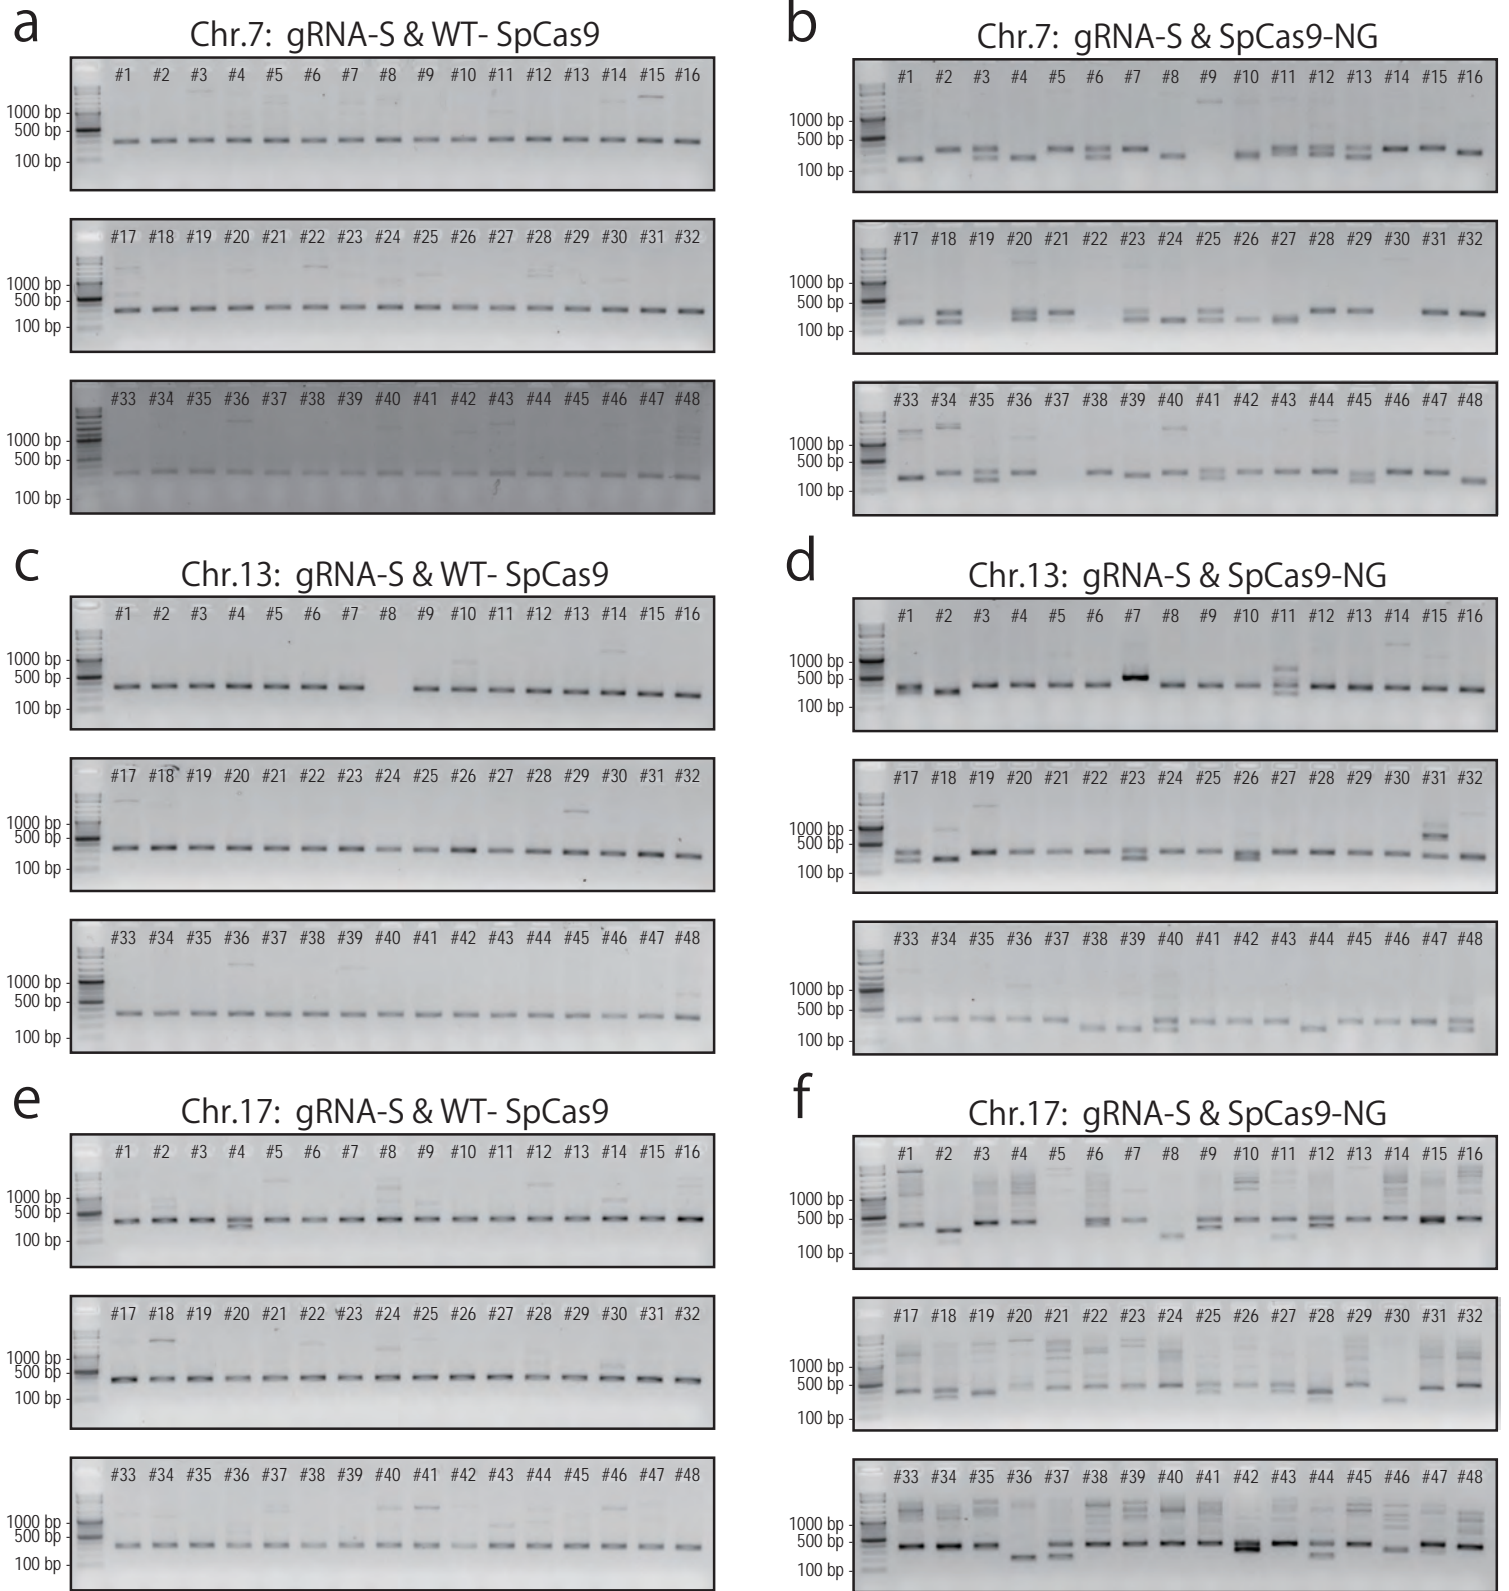

**Supplementary Figure 7. Whole gel images of PCR based screening of ES cell clones, related to Supplementary Figure 2d.**

# Supplementary Figure 8

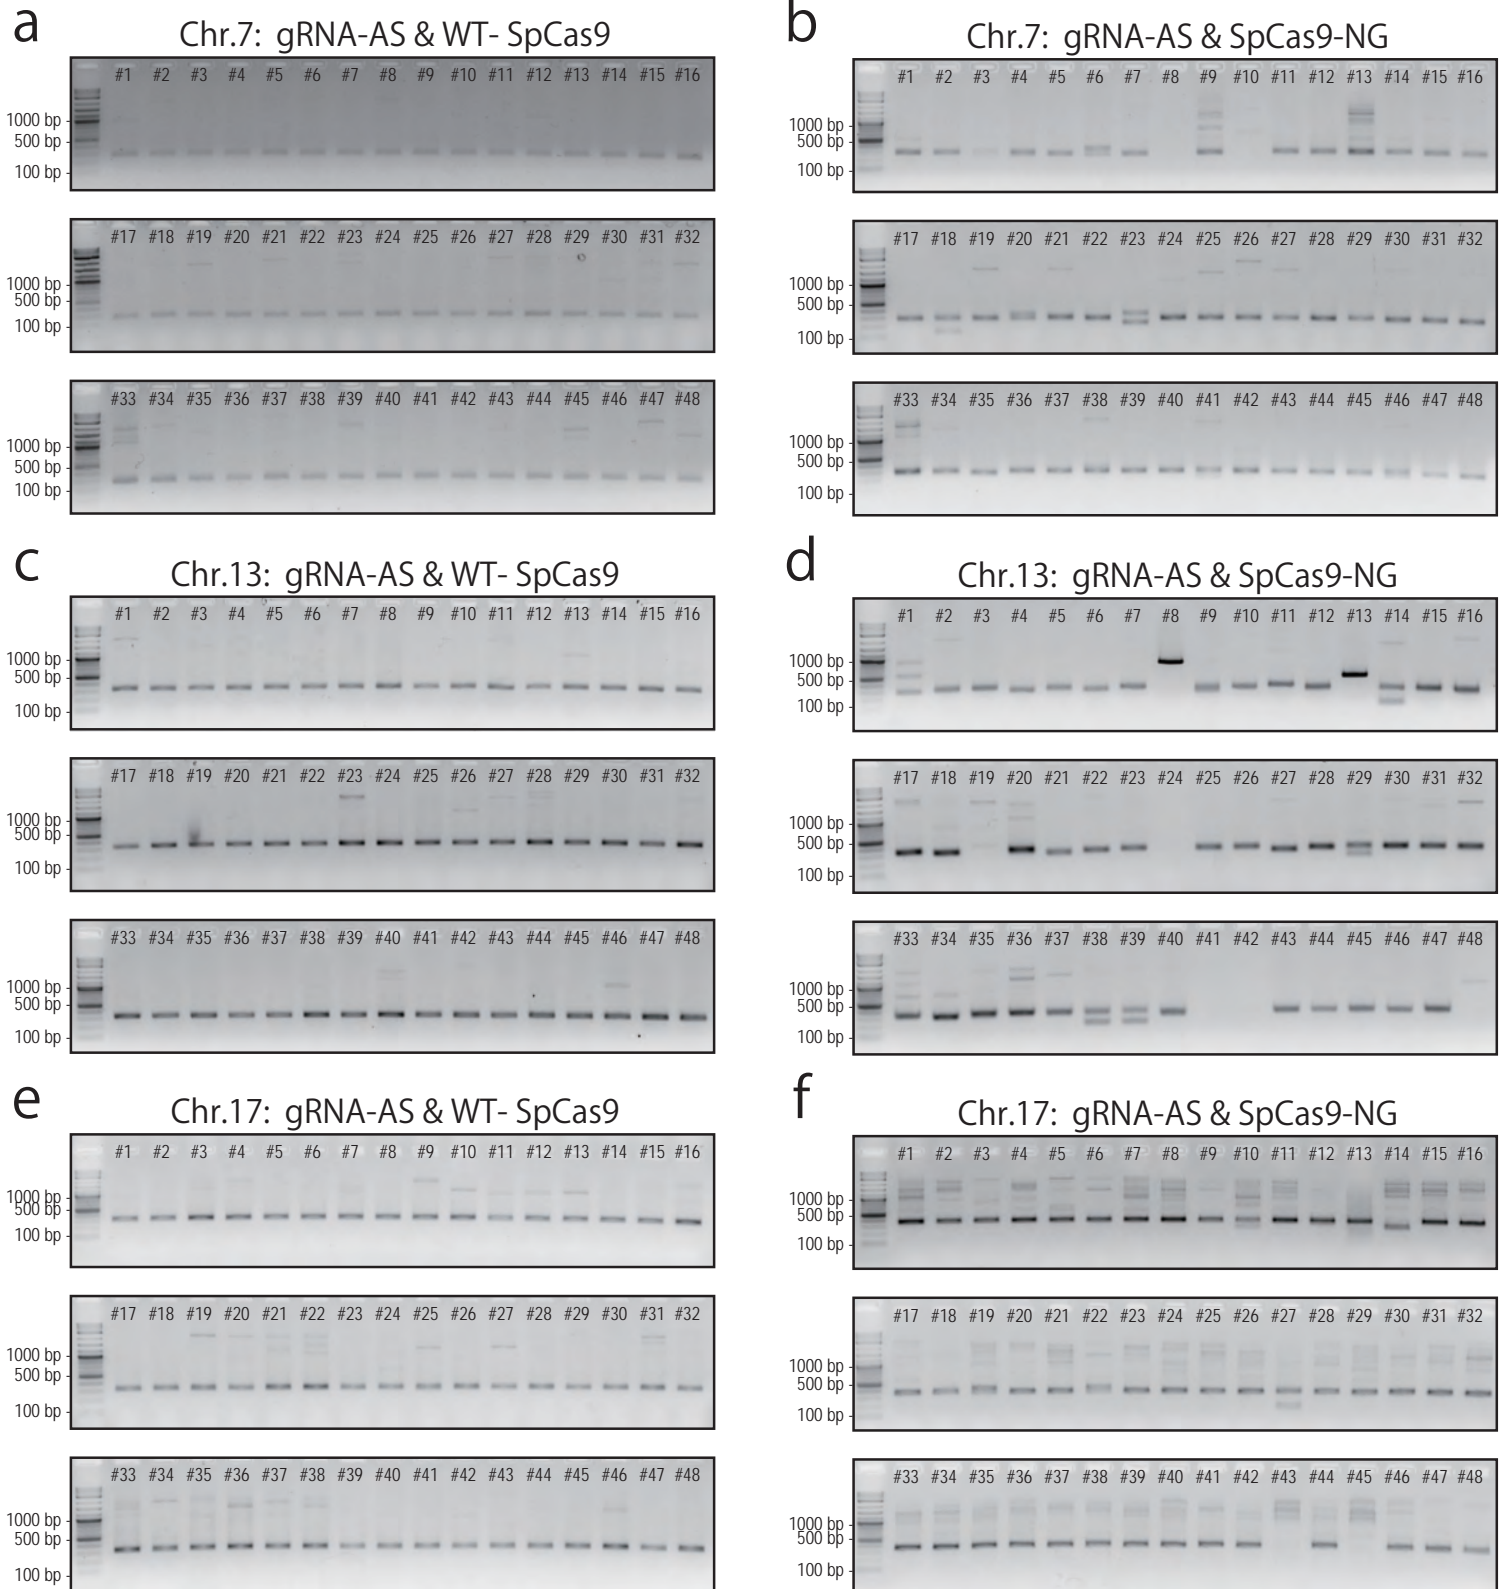

**Supplementary Figure 8. Whole gel images of PCR based screening of ES cell clones, related to Supplementary Figure 2d.**

## Supplementary Figure 9

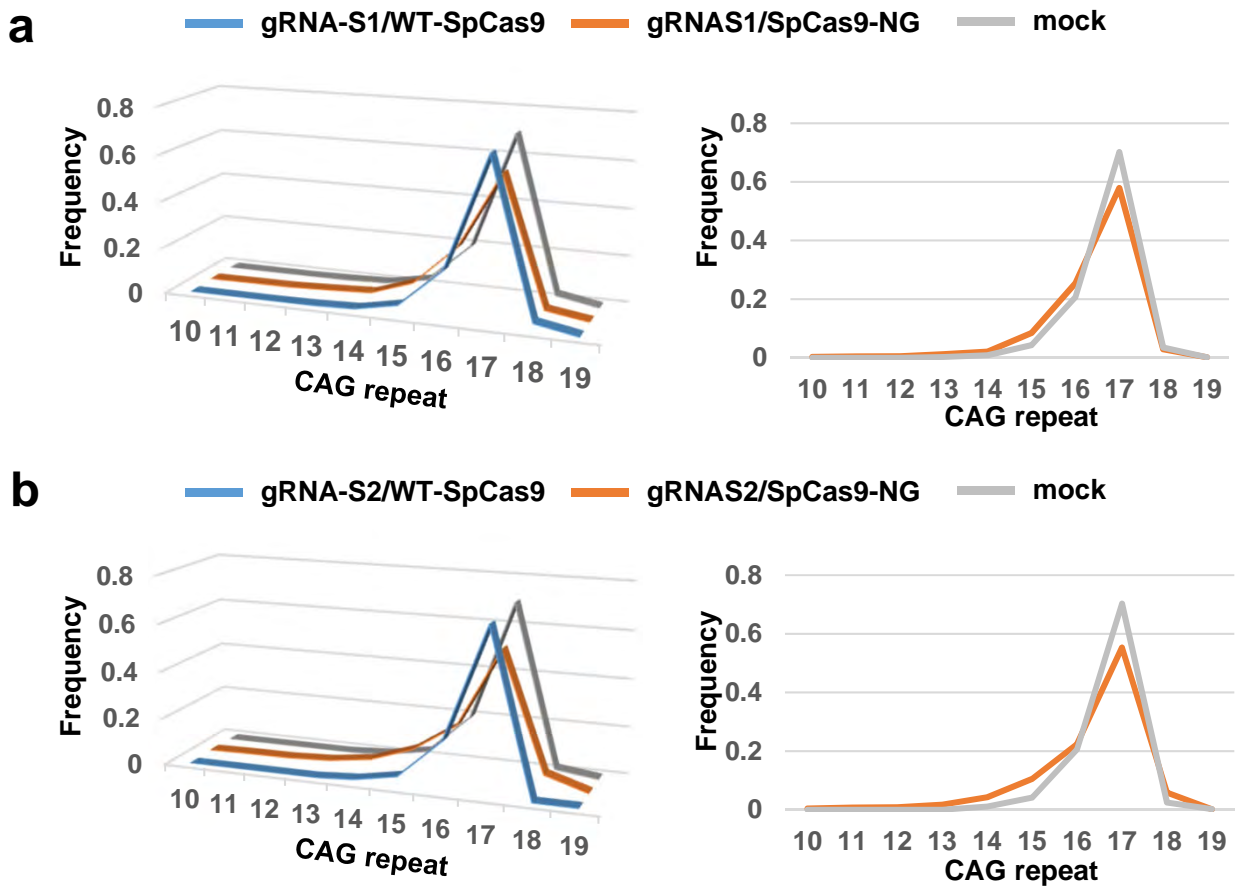

### Supplementary Figure 9. Contraction of HTT CAG repeats in HEK293T cells.

**a–b** Histogram of the number of HTT CAG repeat sequences in HEK293T cells transfected with gRNA-S1 (a) and -S2 (b) expression vectors in Figure 3. The frequency of X repeats was calculated by the following formula:  $[(\text{Reads with X repeats}) / \sum_{X=10}^{19} (\text{Reads with X repeats})]$ .

# Supplementary Figure 10

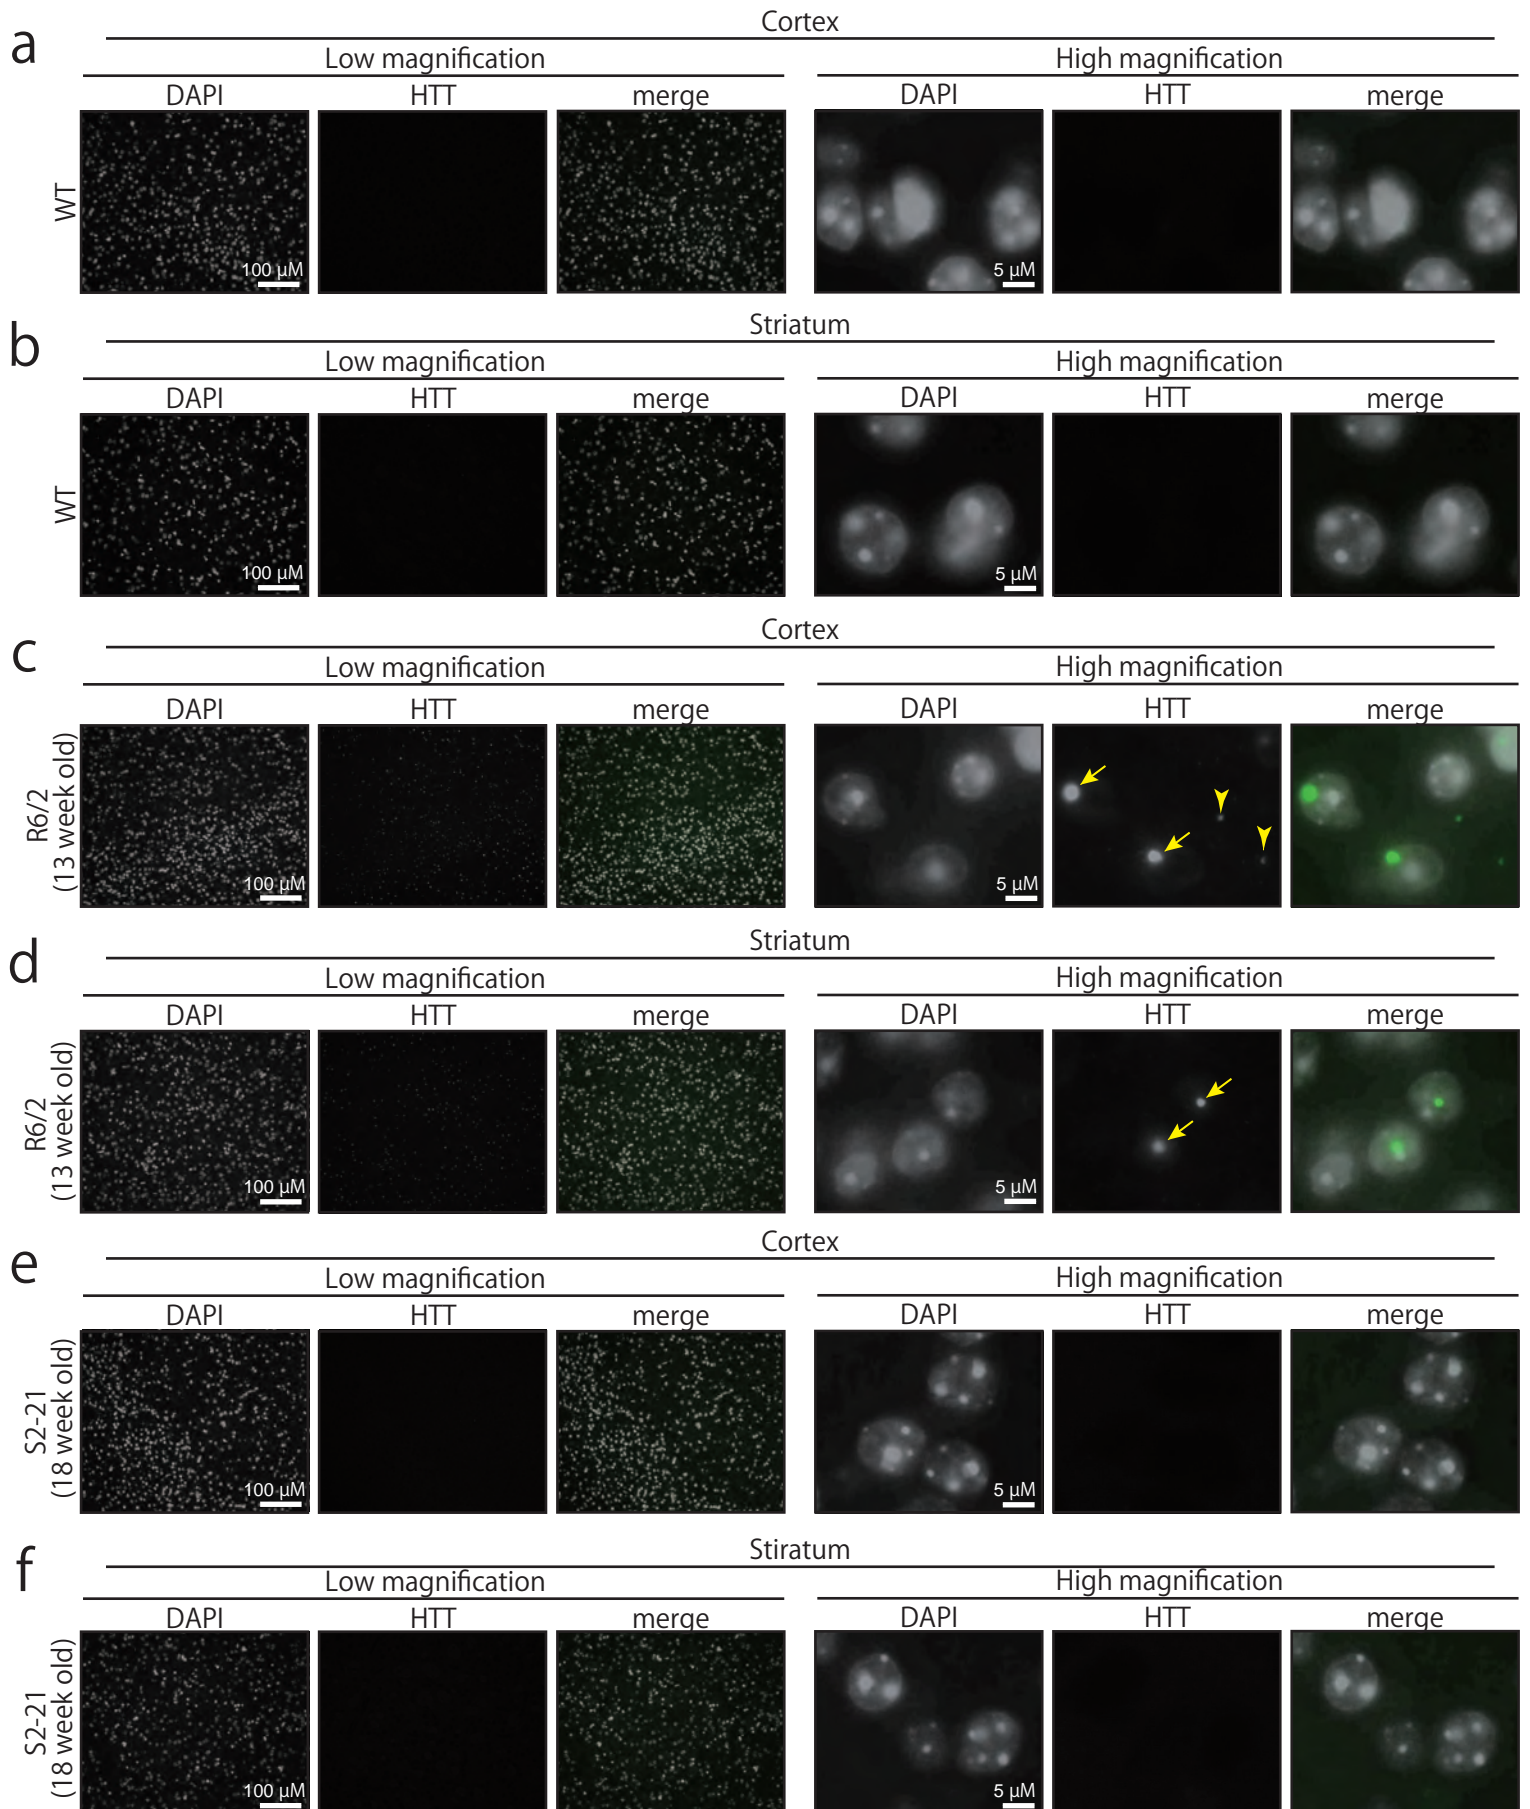

**Supplementary Figure 10. HTT aggregation detection by Immunofluorescence, related to Figure 6i–n.**  
**a–f** Immunofluorescent staining with anti-human HTT antibody. White arrows and arrowheads indicate HTT aggregates inside and outside the nucleus, respectively. sequence and PAM, respectively.
