# Supplementary material for: Precise CAG repeat contraction in a Huntington’s Disease mouse model is enabled by gene editing with SpCas9-NG
Source: PubMed Central journal article supplement (PMC8222283; doi:10.1038/s42003-021-02304-w), 2021-06-23
Supplement: 42003_2021_2304_MOESM3_ESM.pdf [file 42003_2021_2304_MOESM3_ESM.pdf]

## **Description of Additional Supplementary Files**

**File name:** Supplementary Movie 1

**Description:** The tail suspension test of R6/2 and genome-edited mice.

**File name:** Supplementary Movie 2

**Description:** The behavior of R6/2 and genome-edited mice.

**File name:** Supplementary Data 1

**Description:** Primers and gRNAs used in this study.

**File name:** Supplementary Data 2

**Description:** Genome editing efficiency in ESCs and zygotes, related to Figure 1d and 1f.

**File name:** Supplementary Data 3

**Description:** Sequence of CAG repeat in genome-edited R6/2 ES clones, related to Figure 2b-f.

**File name:** Supplementary Data 4

**Description:** Bodyweight of chimeric mice, related to Figure 5b and Table 1.

**File name:** Supplementary Data 5

**Description:** Number of HTT foci in brain sections of chimeric mice, related Figure 5g-h.

**File name:** Supplementary Data 6

**Description:** Bodyweight of R6/2 and genome-edited mice, related to Figure 6a-d.
